# Supplementary material for: Impact of an anticipatory care planning intervention on unscheduled acute hospital care using difference-in-difference analysis
Source: HighWire-hosted journal article supplement (doi:10.1136/bmjhci-2020-100305), 2021-05-01
Supplement: bmjhci-2020-100305supp001_data_supplement.pdf [file bmjhci-2020-100305supp001_data_supplement.pdf]

**Figure A1: Histogram of the estimated coefficients of treatment effect on total cost of admissions (scheduled and unscheduled) based on bootstrap regressions with 10,000 replications**

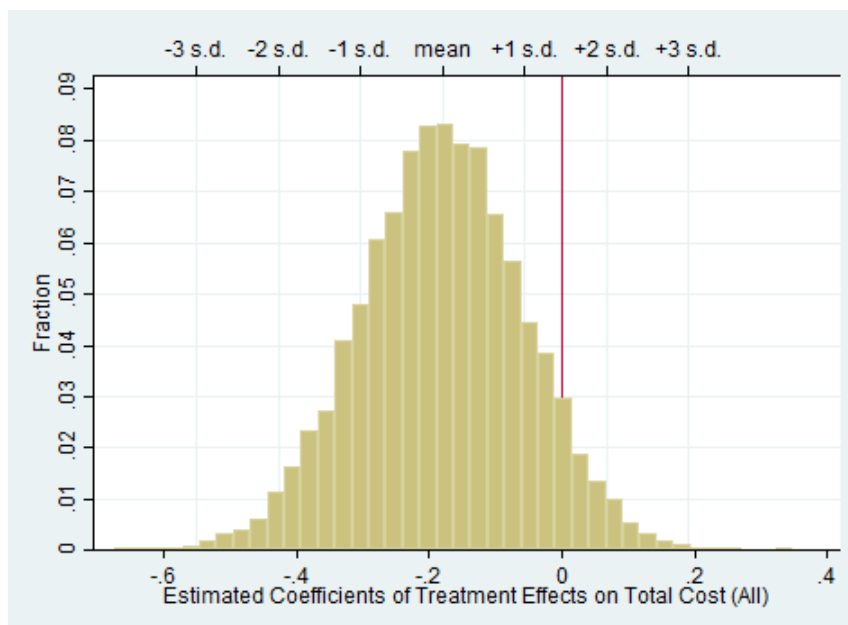

NB: The Y axis represents a fraction of all replications where each range of estimated coefficients occurs, and the X axis illustrates the size of estimated coefficients of the intervention effects from smaller than -0.6 to almost 0.4.

**Table A1: Estimated effects of PACT intervention on the numbers of unscheduled admissions and ED visits by groups of patients (keeping other control characteristics at mean of the sample)**

| Predicted for:                                  | Predicted effects | [95% Conf. Interval] |       |
|-------------------------------------------------|-------------------|----------------------|-------|
| SPARRA 10 <sup>th</sup> percentile (score = 37) | -0.153            | -0.394               | 0.087 |
| SPARRA 25 <sup>th</sup> percentile (score = 64) | -0.305            | -0.784               | 0.175 |
| SPARRA median (score = 79)                      | -0.446            | -1.151               | 0.259 |
| SPARRA 75 <sup>th</sup> percentile (score = 83) | -0.494            | -1.275               | 0.287 |
| SPARRA 90 <sup>th</sup> percentile (score = 87) | -0.547            | -1.412               | 0.319 |
| Patient aged 16-24                              | -0.465            | -1.208               | 0.278 |
| Patient aged 25-34                              | -0.426            | -1.097               | 0.245 |
| Patient aged 65-74                              | -0.330            | -0.855               | 0.196 |
| Patient aged 75 and over                        | -0.355            | -0.919               | 0.208 |
| Average male patient                            | -0.358            | -0.922               | 0.207 |
| Average female patient                          | -0.356            | -0.917               | 0.205 |

**Table A2: Estimated effects of PACT intervention on on total cost of all types of admissions (both scheduled and unscheduled) by groups of patients (keeping other control characteristics at mean of the sample)**

| Predicted for:                                  | Predicted effects | [95% Conf. Interval] |         |
|-------------------------------------------------|-------------------|----------------------|---------|
| SPARRA 10 <sup>th</sup> percentile (score = 37) | -946.9            | -2,404.0             | 510.3   |
| SPARRA 25 <sup>th</sup> percentile (score = 64) | -2,358.7          | -5,955.4             | 1,238.0 |
| SPARRA median (score = 79)                      | -3,916.4          | -9,879.2             | 2,046.3 |
| SPARRA 75 <sup>th</sup> percentile (score = 83) | -4,483.5          | -11,309.7            | 2,342.8 |
| SPARRA 90 <sup>th</sup> percentile (score = 87) | -5,132.6          | -12,948.9            | 2,683.6 |
| Patient aged 16-24                              | -2,211.1          | -5,595.8             | 1,173.7 |
| Patient aged 25-34                              | -2,500.2          | -6,283.8             | 1,283.4 |
| Patient aged 65-74                              | -4,227.2          | -10,853.6            | 2,399.3 |
| Patient aged 75 and over                        | -3,734.1          | -9,546.2             | 2,078.0 |
| Average male patient                            | -2,639.4          | -6,680.9             | 1,402.1 |
| Average female patient                          | -3,210.4          | -8,083.7             | 1,662.9 |
