# Supplementary material for: Impact of an anticipatory care planning intervention on unscheduled acute hospital care using difference-in-difference analysis
Source: HighWire-hosted journal article supplement (doi:10.1136/bmjhci-2020-100305), 2021-05-01
Supplement: bmjhci-2020-100305supp002_data_supplement.pdf [file bmjhci-2020-100305supp002_data_supplement.pdf]

**Supplemental table 1: Effects of the intervention on total cost of unscheduled admissions based on generalized linear model with gamma distribution and robust standard errors**

| Variable              | Coef.   | Std.Err. | Z-stat | P-value | [95% Conf. Interval] |         |
|-----------------------|---------|----------|--------|---------|----------------------|---------|
| intervention          | -0.1998 | 0.0625   | -3.2   | 0.001   | -0.3223              | -0.0773 |
| after                 | -0.1758 | 0.0827   | -2.12  | 0.034   | -0.3380              | -0.0136 |
| intervention*after    | -0.1379 | 0.1036   | -1.33  | 0.183   | -0.3410              | 0.0651  |
| female                | 0.1521  | 0.0519   | 2.93   | 0.003   | 0.0504               | 0.2538  |
| age 16-24             | 0.0791  | 0.1567   | 0.5    | 0.614   | -0.2280              | 0.3862  |
| age 25-34             | 0.0561  | 0.1453   | 0.39   | 0.699   | -0.2286              | 0.3409  |
| age 35-44             | 0.0919  | 0.1446   | 0.64   | 0.525   | -0.1916              | 0.3754  |
| age 45-54             | -0.0772 | 0.1401   | -0.55  | 0.582   | -0.3518              | 0.1975  |
| age 55-64             | -0.0340 | 0.1416   | -0.24  | 0.81    | -0.3116              | 0.2436  |
| age 65-74             | 0.0695  | 0.1412   | 0.49   | 0.622   | -0.2072              | 0.3463  |
| age 75 up             |         |          |        |         | Reference group      |         |
| SIMD Quintile 1       | -0.2596 | 0.0971   | -2.67  | 0.008   | -0.4500              | -0.0693 |
| SIMD Quintile 2       | -0.0752 | 0.0959   | -0.78  | 0.433   | -0.2632              | 0.1128  |
| SIMD Quintile 3       | -0.1874 | 0.1007   | -1.86  | 0.063   | -0.3847              | 0.0099  |
| SIMD Quintile 4       | 0.1562  | 0.1098   | 1.42   | 0.155   | -0.0590              | 0.3714  |
| SIMD Quintile 5       |         |          |        |         | Reference group      |         |
| SPARRA score at entry | 0.0304  | 0.0019   | 15.83  | 0       | 0.0266               | 0.0341  |
| intercept             | 7.2837  | 0.2274   | 32.04  | 0       | 6.8381               | 7.7293  |

Number of obs = 2,654  
Log pseudo likelihood = -26881.3374  
NB: Costs of emergency department visits and inpatient stays were calculated using values from Information Services Division (ISD), NHS Scotland in 2017. The average cost of an accident and emergency visit from 14 hospitals in Scotland was used to estimate cost per ED visit<sup>1</sup>. To estimate cost per day for inpatient stays within four specialties (general medicine, gastroenterology, respiratory medicine and general surgery (excluding vascular)), the mean local value across these four specialties was used, while for other specialties, an average local cost per day across all other specialties was used.

<sup>1</sup> <https://www.isdscotland.org/Health-Topics/Finance/Costs/Detailed-Tables/Speciality-Costs/index.asp>

**Supplemental table 2: Effects of the intervention on total cost of all types of admissions (both scheduled and unscheduled) based on generalized linear model with gamma distribution and robust standard errors**

| Variable                                                                                         | Coef.   | Std.Err. | Z-stat | P-value | [95% Conf. Interval] |         |
|--------------------------------------------------------------------------------------------------|---------|----------|--------|---------|----------------------|---------|
| intervention                                                                                     | -0.0593 | 0.0678   | -0.87  | 0.382   | -0.1921              | 0.0735  |
| after                                                                                            | -0.0602 | 0.0934   | -0.64  | 0.519   | -0.2432              | 0.1228  |
| intervention*after                                                                               | -0.1781 | 0.1214   | -1.47  | 0.143   | -0.4160              | 0.0599  |
| female                                                                                           | 0.1958  | 0.0618   | 3.17   | 0.002   | 0.0747               | 0.3170  |
| age 16-24                                                                                        | -0.5240 | 0.1617   | -3.24  | 0.001   | -0.8410              | -0.2070 |
| age 25-34                                                                                        | -0.4012 | 0.1562   | -2.57  | 0.01    | -0.7073              | -0.0950 |
| age 35-44                                                                                        | -0.3522 | 0.1515   | -2.32  | 0.02    | -0.6493              | -0.0552 |
| age 45-54                                                                                        | -0.2951 | 0.1549   | -1.91  | 0.057   | -0.5987              | 0.0084  |
| age 55-64                                                                                        | -0.2252 | 0.1506   | -1.5   | 0.135   | -0.5205              | 0.0700  |
| age 65-74                                                                                        | 0.1240  | 0.1497   | 0.83   | 0.407   | -0.1694              | 0.4174  |
| age 75 up                                                                                        |         |          |        |         | Reference group      |         |
| SIMD Quintile 1                                                                                  | -0.2492 | 0.1211   | -2.06  | 0.04    | -0.4865              | -0.0119 |
| SIMD Quintile 2                                                                                  | -0.1699 | 0.1239   | -1.37  | 0.17    | -0.4126              | 0.0729  |
| SIMD Quintile 3                                                                                  | -0.2290 | 0.1215   | -1.88  | 0.059   | -0.4671              | 0.0092  |
| SIMD Quintile 4                                                                                  | 0.0246  | 0.1288   | 0.19   | 0.848   | -0.2278              | 0.2771  |
| SIMD Quintile 5                                                                                  |         |          |        |         | Reference group      |         |
| SPARRA score at entry                                                                            | 0.0338  | 0.0026   | 12.84  | 0       | 0.0286               | 0.0390  |
| intercept                                                                                        | 7.8707  | 0.2854   | 27.58  | 0       | 7.3113               | 8.4300  |
| Number of obs = 2,654                                                                            |         |          |        |         |                      |         |
| Log pseudo likelihood = -28666.77967                                                             |         |          |        |         |                      |         |
| NB: All costs of visits and inpatient stays were calculated as explained in Supplemental table 1 |         |          |        |         |                      |         |

**Supplemental table 3: Predicted value of the total cost of admissions estimated at means of all other control variables based on the generalized linear model with gamma distribution and robust standard errors**

|                       | Predicted value | Delta-meth. Std. Err. | [95% Conf. Interval] |           |
|-----------------------|-----------------|-----------------------|----------------------|-----------|
| Control group         | 19,984.57       | 1,064.94              | 17,897.33            | 22,071.82 |
| Intervention group    | 17,230.03       | 618.20                | 16,018.38            | 18,441.68 |
| Before                | 19,777.44       | 677.01                | 18,450.52            | 21,104.36 |
| After                 | 16,488.20       | 768.64                | 14,981.70            | 17,994.71 |
| Control & Before      | 20,595.24       | 1,130.03              | 18,380.42            | 22,810.06 |
| Control & After       | 19,392.01       | 1,625.72              | 16,205.66            | 22,578.37 |
| Intervention & Before | 19,409.82       | 817.39                | 17,807.77            | 21,011.87 |
| Intervention & After  | 15,295.04       | 879.91                | 13,570.46            | 17,019.63 |
